# Supplementary material for: Isolation and Pathogenicity Analysis of a G5P[23] Porcine Rotavirus Strain
Source: MDPI journal article supplement (doi:10.3390/v16010021), 2023-12-22
Supplement: s1 [file s1]

**Table S1.** Sequences of primers and probes used in this study.

| Primer Name | 5'- sequence -3'                           | Target | Reference  |
|-------------|--------------------------------------------|--------|------------|
| PDCoV-RTF   | 5'-CGACCACATGGCTCCAATTC-3'                 |        |            |
| PDCoV-RTR   | 5'-CAGCTCTTGCCCATGTAGCTT-3'                | M      | [1]        |
| PDCoV-RTP   | 5'-FAM-CACACCAGTCGTTAAGCATGGCAAGC-BHQ-1-3' |        |            |
| PEDV-RTF    | 5'-GATACTTTGGCCTCTTGTGT-3'                 |        |            |
| PEDV-RTR    | 5'-CACAACCGAATGCTATTGACG-3'                | M      |            |
| PEDV-RTP    | 5'-FAM-TTCAGCATCCTTATGGCTTGCATC-BHQ1-3'    |        | [2]        |
| TGEV-RTF    | 5'-TGCCATGAACAAACCAAC-3'                   |        |            |
| TGEV-RTR    | 5'-GGCACTTTACCATCGAAT-3'                   | N      |            |
| TGEV-RTP    | 5'-FAM-FATAGCACCACGACTACCAAGC-BHQ1-3'      |        |            |
| RVA-RTF     | 5'-GCTAGGGAYAAA ATTGTTGAAGGTA-3'           |        |            |
| RVA-RTR     | 5'-ATTGGCAAATTT CCTATT CCTCC-3'            |        | [3]        |
| RVA-RTP     | 5'-FAM-ATGAATGGA AATAATTTTCAAAC-BHQ1-3'    | VP6    |            |
| RVA-RTF     | 5'-GGCTTTTAAACGAAGTCTTC-3'                 |        |            |
| RVA-RTR     | 5'-GGTCACATCCTCTCACT-3'                    |        | This study |

**Table S2.** Comparison of nucleotide and amino acid characteristics of RVA/Pig/China/JS/2023/G5P[23] strain with the closest strains in the GenBank database.

| Gene | Genotype | Closely Related Strains             | Nucleotide (%) | Amino acid (%) | Accession  |
|------|----------|-------------------------------------|----------------|----------------|------------|
| VP1  | R1       | RVA/Pig-tc/USA/Gottfried/1983/G4P6  | 99.0           | 94.8           | KR052746   |
| VP2  | C1       | RVA/Pig-tc/USA/OSU/1977/G5P7        | 98.4           | 92.1           | KR052758   |
| VP3  | M1       | RVA/Human-tc/USA/Wa/1974/G1P8       | 96.8           | 87.4           | MT796880   |
| VP4  | P[23]    | P23-RVA/Pig-tc/VEN/A34/1985/G5P23   | 84.5           | 89.5           | AY174094   |
| VP6  | I5       | RVA/Pig-tc/MEX/YM/1983/G11P7        | 90.5           | 89.1           | X69487     |
| VP7  | G5       | RVA/Human-tc/BRA/IAL28/1992/G5P8    | 91.9           | 87.2           | EF672588   |
| NSP1 | A8       | RVA/Pig-tc/MEX/YM/1983/G11P7        | 93.2           | 89.3           | D38154     |
| NSP2 | N1       | RVA/Human-wt/BGD/Dhaka25/2002/G12P8 | 90.1           | 95.5           | DQ146656   |
| NSP3 | T1       | RVA/Pig-tc/MEX/YM/1983/G11P7        | 87.6           | 88.9           | GU199518   |
| NSP4 | E1       | RVA/Human-tc/USA/P/1974/G3[P8]      | 89.8           | 88.1           | EF672603.1 |
| NSP5 | H1       | RVA/Pig-tc/USA/Gottfried/1983/G4P6  | 89.5           | 96.1           | KR052745   |

## References:

1. Zhu, J.H.; Rawal, G.; Aljets, E.; Yim-Im, W.; Yang, Y.L.; Huang, Y.W.; Krueger, K.; Gauger, P.; Main, R.; Zhang, J.Q. Development and Clinical Applications of a 5-Plex Real-Time RT-PCR for Swine Enteric Coronaviruses. *Viruses* **2022**, *14*, 1536. <https://doi.org/10.3390/v14071536>.
2. Huang, X.; Chen, J.N.; Yao, G.; Guo, Q.Y.; Wang, J.Q.; Liu, G.L. A TaqMan-probe-based multiplex real-time RT-qPCR for simultaneous detection of porcine enteric coronaviruses. *Appl. Microbiol. Biotechnol.* **2019**, *103*, 4943–4952. <https://doi.org/10.1007/s00253-019-09835-7>.
3. Marthaler, D.; Homwong, N.; Rossow, K.; Culhane, M.; Goyal, S.; Collins, J.; Matthijnsens, J.; Ciarlet, M. Rapid detection and high occurrence of porcine rotavirus A, B, and C by RT-qPCR in diagnostic samples. *J. Virol. Methods* **2014**, *209*, 30–34. <https://doi.org/10.1016/j.jviromet.2014.08.018>.
